# Supplementary material for: Benzothiazole Derivatives as Multifunctional Antioxidant Agents for Skin Damage: Structure–Activity Relationship of a Scaffold Bearing a Five-Membered Ring System
Source: MDPI journal article supplement (doi:10.3390/antiox11020407), 2022-02-17
Supplement: s1 [file s1]

# Benzothiazole Derivatives as Multifunctional Antioxidant Agents for Skin Damage: Structure–Activity Relationship of a Scaffold Bearing a Five-Membered Ring System

Ernestine Nicaise Djuidje <sup>1,†</sup>, Riccardo Barbari <sup>2,†</sup>, Anna Baldisserotto <sup>1,\*</sup>, Elisa Durini <sup>1</sup>, Sabrina Sciabica <sup>1</sup>, Jan Balzarini <sup>3</sup>, Sandra Liekens <sup>3</sup>, Silvia Vertuani <sup>1,\*</sup> and Stefano Manfredini <sup>1</sup>

<sup>1</sup> Department of Life Sciences and Biotechnology, Master Course in Cosmetic Science and Technologies,  
University of Ferrara, via L. Borsari 46, 44121 Ferrara, Italy; djdrst@unife.it (E.N.D.);  
elisa.durini@unife.it (E.D.); scbsrn@unife.it (S.S.); mv9@unife.it (S.M.)

<sup>2</sup> Department of Chemical and Pharmaceutical Sciences, University of Ferrara, via Fossato di  
Mortara 17-19, 44121 Ferrara, Italy; riccardo.barbari@unife.it

<sup>3</sup> Laboratory of Virology and Chemotherapy, Rega Institute for Medical Research, Department of  
Microbiology and Immunology, KU Leuven, University of Leuven, B-3000 Leuven, Belgium;  
jan.balzarini@kuleuven.be (J.B.); sandra.lieken@rega.kuleuven.be (S.L.)

\* Correspondence: bldnna@unife.it (A.B.); vrs@unife.it (S.V.);  
Tel.: +39-0532-455258 (A.B.); +39-0532-455294 (S.V.)

† These authors contributed equally to this work.

**Table S1.** Parameter values obtained from the UV spectra of the synthesized compounds solubilized in DMSO and MeOH.

|      | Solvent | $\lambda_{\text{max}}$ (nm) | A     | $\epsilon$ |
|------|---------|-----------------------------|-------|------------|
| PBSA | DMSO    | 310.50                      | 1.130 | 23839.66   |
|      | MeOH    | 304.50                      | 1.460 | 30801.69   |
| 8a   | DMSO    | 333.40                      | 2.360 | 29500.00   |
|      | MeOH    | 329.40                      | 1.540 | 23692.31   |
| 8b   | DMSO    | 348.87                      | 0.370 | 5308.47    |
|      | MeOH    | 341.63                      | 0.190 | 3089.43    |
| 8c   | DMSO    | 344.37                      | 0.700 | 13944.22   |
|      | MeOH    | 341.40                      | 0.760 | 13263.53   |
| 9a   | DMSO    | 322.10                      | 1.620 | 21715.82   |
|      | MeOH    | 316.40                      | 2.750 | 32505.91   |
| 9b   | DMSO    | 331.90                      | 1.36  | 23901.58   |
|      | MeOH    | 327.57                      | 1.02  | 19318.18   |
| 9c   | DMSO    | 329.00                      | 0.59  | 10332.75   |
|      | MeOH    | 325.30                      | 0.740 | 13805.97   |
| 10a  | DMSO    | 321.80                      | 0.880 | 12735.17   |
|      | MeOH    | 319.50                      | 0.760 | 9706.26    |
| 10b  | DMSO    | 340.00                      | 1.160 | 17818.74   |
|      | MeOH    | 334.57                      | 1.140 | 21268.66   |
| 10c  | DMSO    | 336.50                      | 0.890 | 20273.35   |
|      | MeOH    | 333.17                      | 0.430 | 9704.99    |

**Table S2.** Parameter values obtained from the UV spectra of the selected compounds solubilized in different combination of solvents.

|            | Solvent                   | $\lambda_{\text{max}}$ (nm) | A    | $\epsilon$ |
|------------|---------------------------|-----------------------------|------|------------|
| <b>8a</b>  | HE                        | 332.80                      | 0.79 | 12153.846  |
|            | DMSO-H <sub>2</sub> O 6:4 | 334.20                      | 1.51 | 23239.769  |
|            | DMSO-H <sub>2</sub> O 4:6 | 333.70                      | 2.35 | 31333.333  |
| <b>9a</b>  | HE                        | 320.70                      | 1.18 | 15817.594  |
|            | DMSO-H <sub>2</sub> O 6:4 | 323.00                      | 1.95 | 301391.04  |
|            | DMSO-H <sub>2</sub> O 4:6 | 322.77                      | 2.43 | 34863.702  |
| <b>10a</b> | HE                        | 320.30                      | 1.32 | 14316.703  |
|            | DMSO-H <sub>2</sub> O 6:4 | 323.00                      | 1.29 | 21535.893  |
|            | DMSO-H <sub>2</sub> O 4:6 | 322.67                      | 0.75 | 12520.868  |

**Table S3.** List of synthesized compounds.

|                                                                                                   |                                                                                                   |                                                                                                    |
|---------------------------------------------------------------------------------------------------|---------------------------------------------------------------------------------------------------|----------------------------------------------------------------------------------------------------|
| 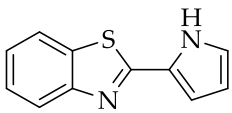<br><b>8a</b>    | <br><b>8b</b>    | <br><b>10c</b>   |
| <br><b>9a</b>  | <br><b>9b</b>  | <br><b>9c</b>  |
| <br><b>10a</b> | <br><b>10b</b> | <br><b>10c</b> |

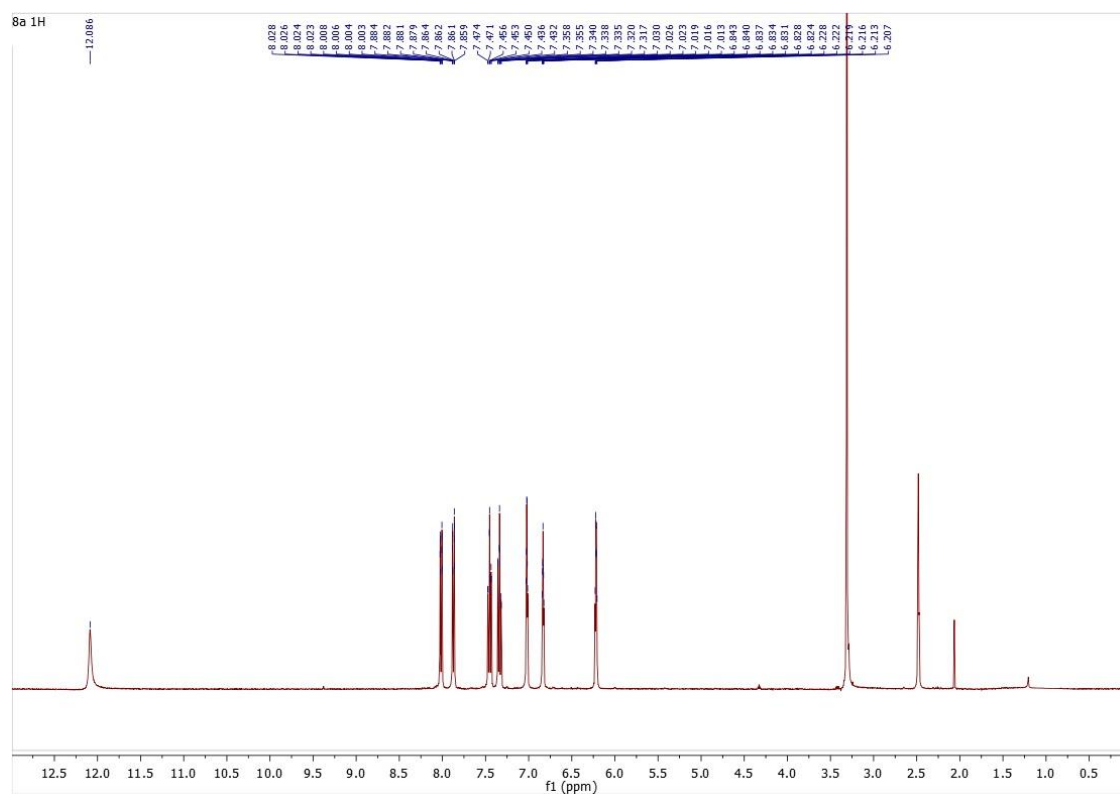

Figure S1.  $^1\text{H}$ -NMR spectrum of compound **8a**.

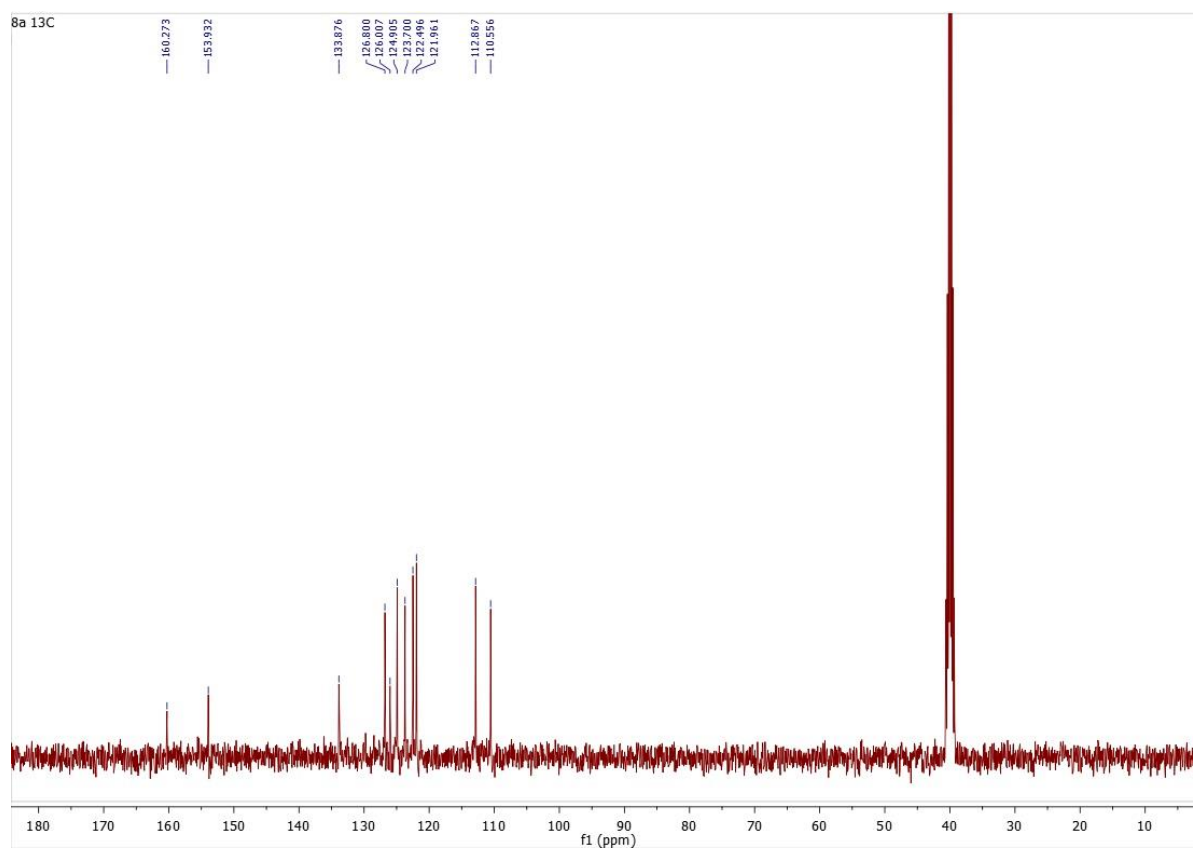

Figure S2.  $^{13}\text{C}$ -NMR spectrum of compound **8a**.

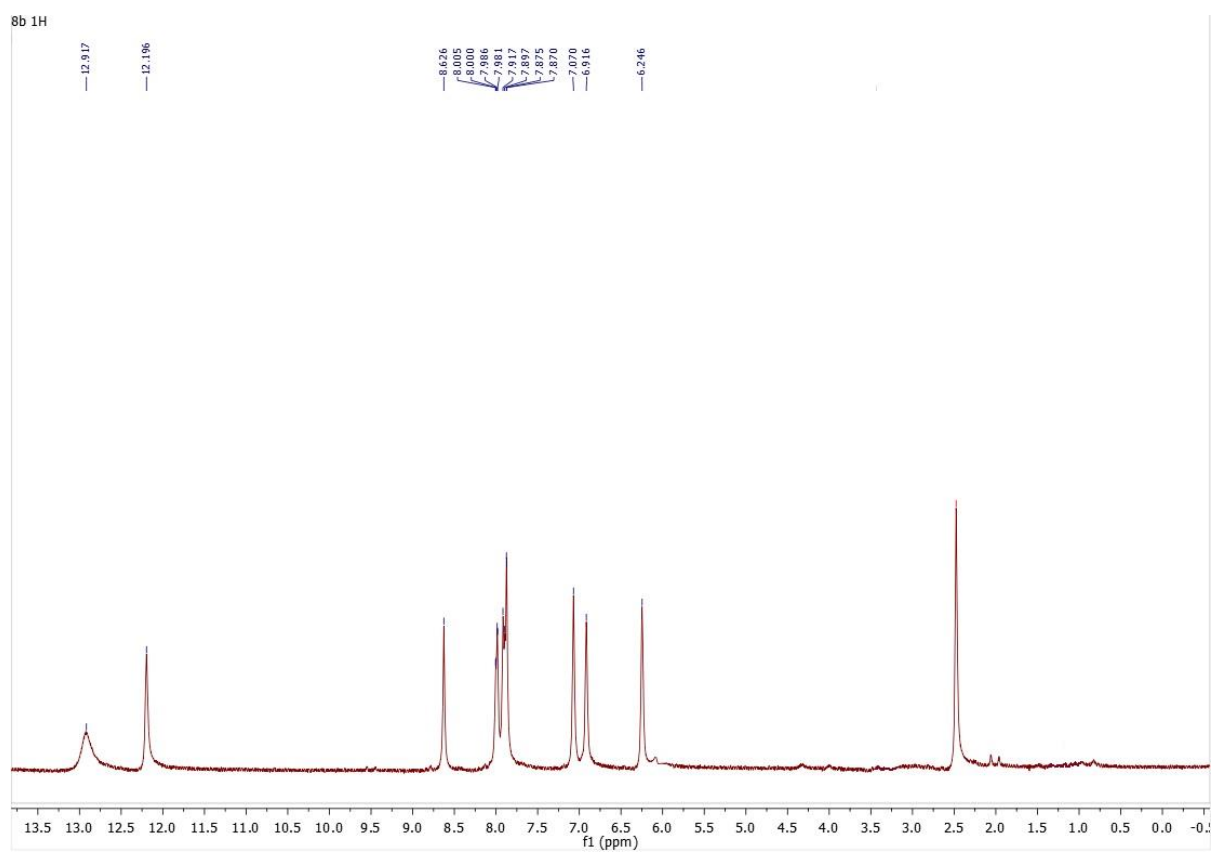

**Figure S3.**  $^1\text{H}$ -NMR spectrum of compound **8b**.

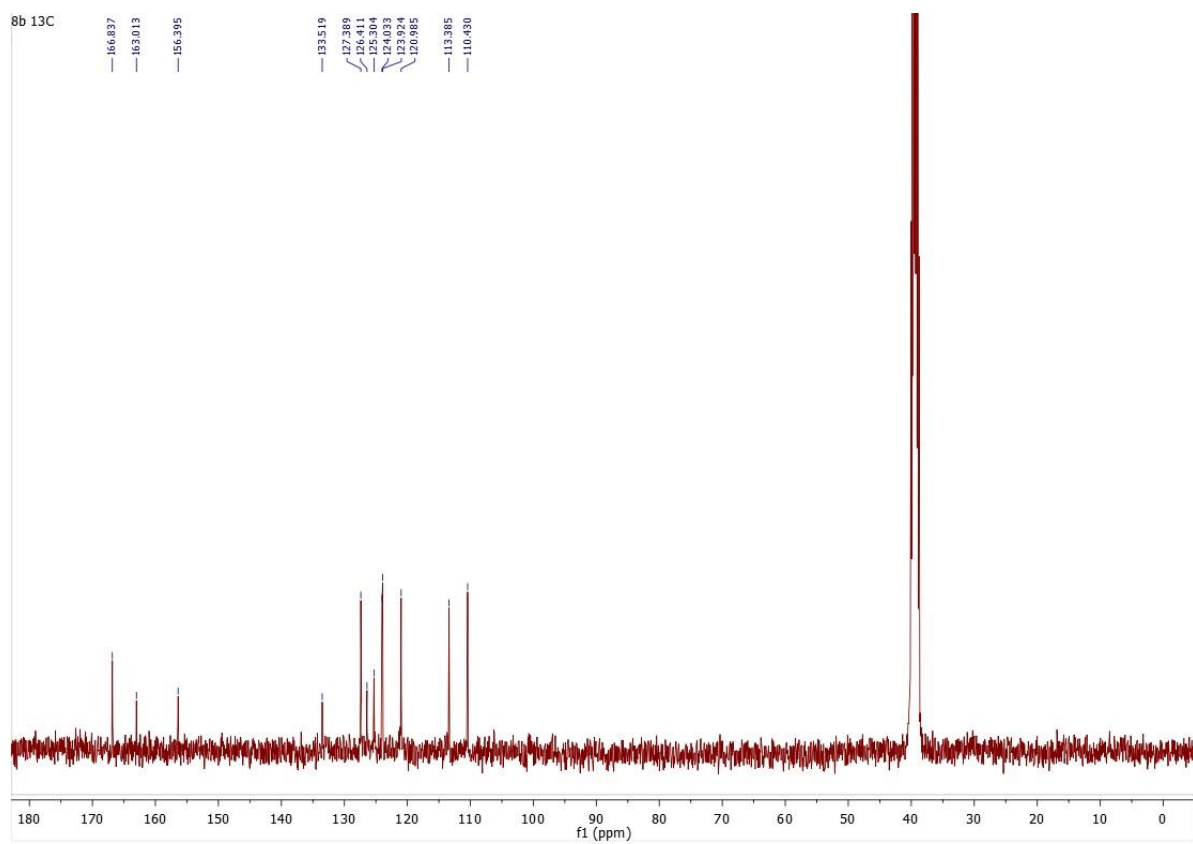

**Figure S4.**  $^{13}\text{C}$ -NMR spectrum of compound **8b**.

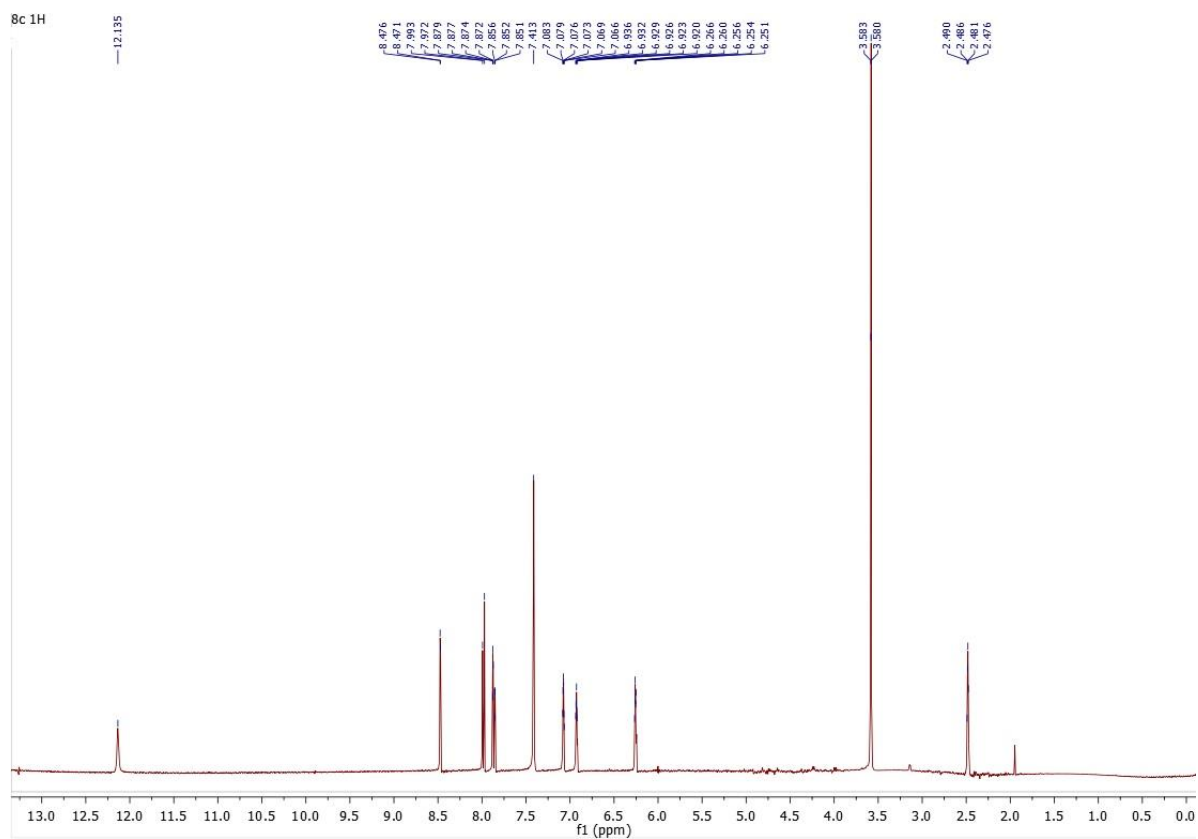

Figure S5.  $^1\text{H}$ -NMR spectrum of compound 8c.

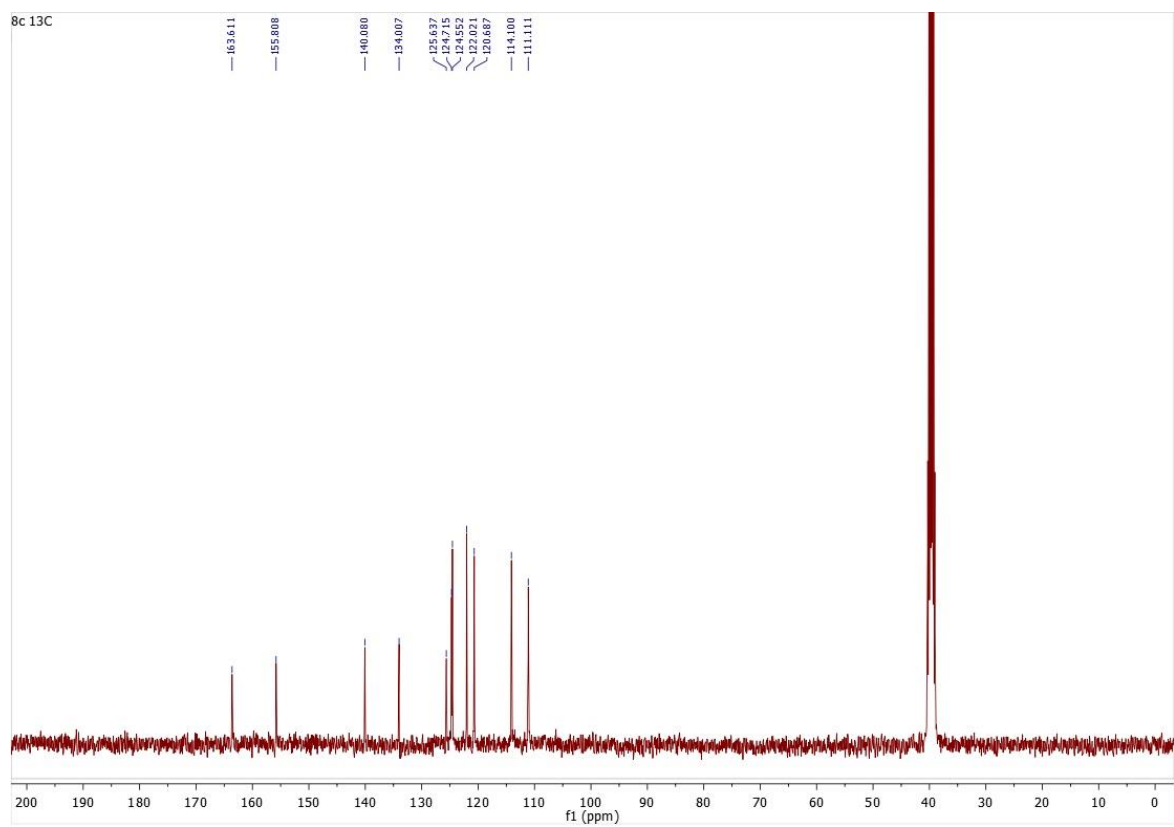

Figure S6.  $^{13}\text{C}$ -NMR spectrum of compound 8c.



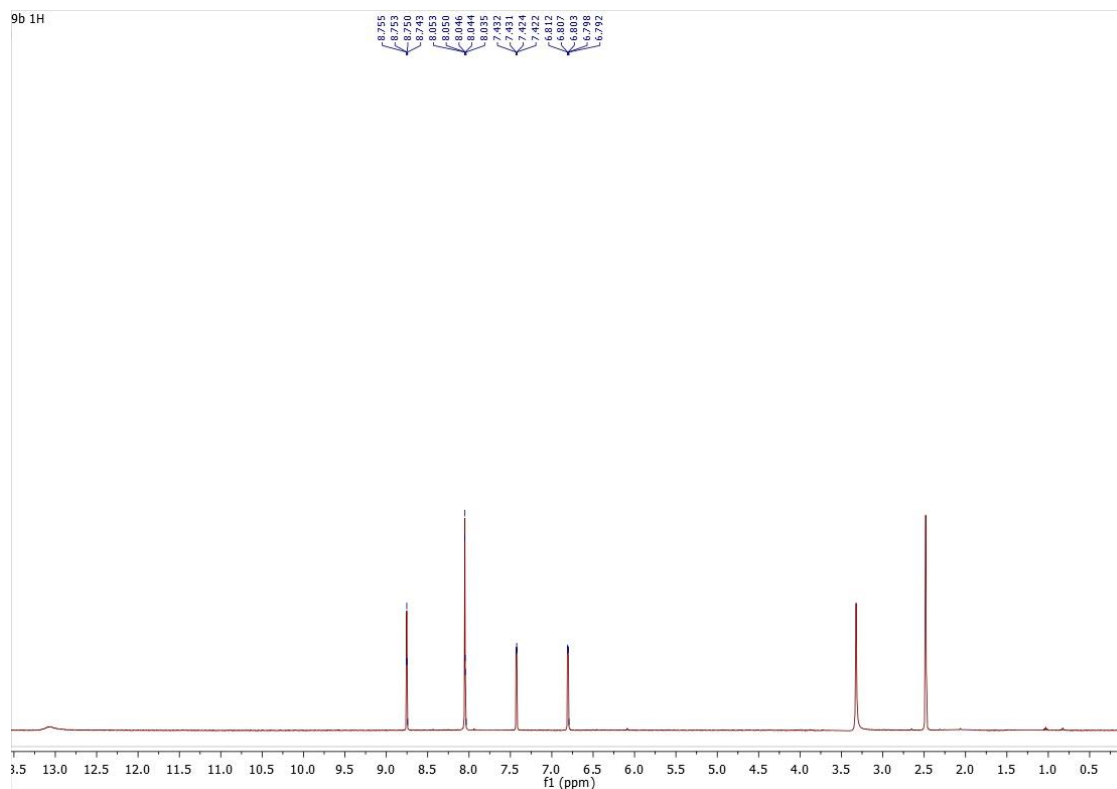

**Figure S9.**  $^1\text{H}$ -NMR spectrum of compound **9b**.

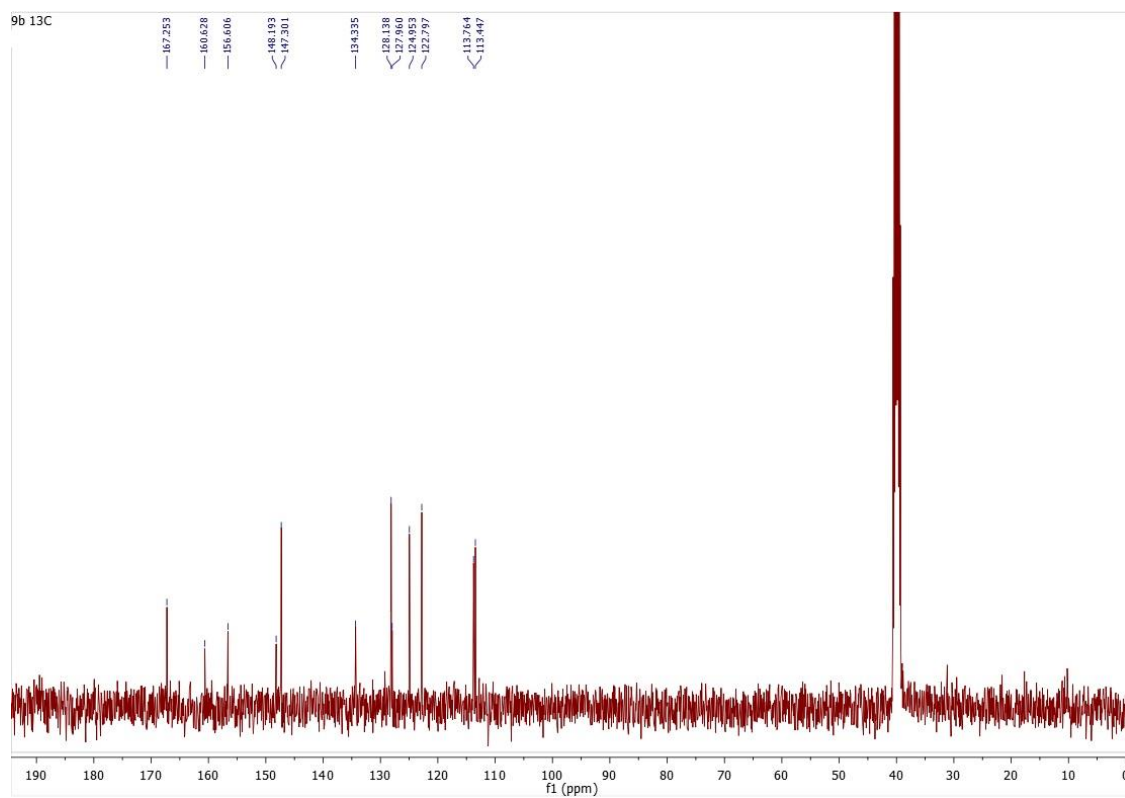

**Figure S10.**  $^{13}\text{C}$ -NMR spectrum of compound **9b**.

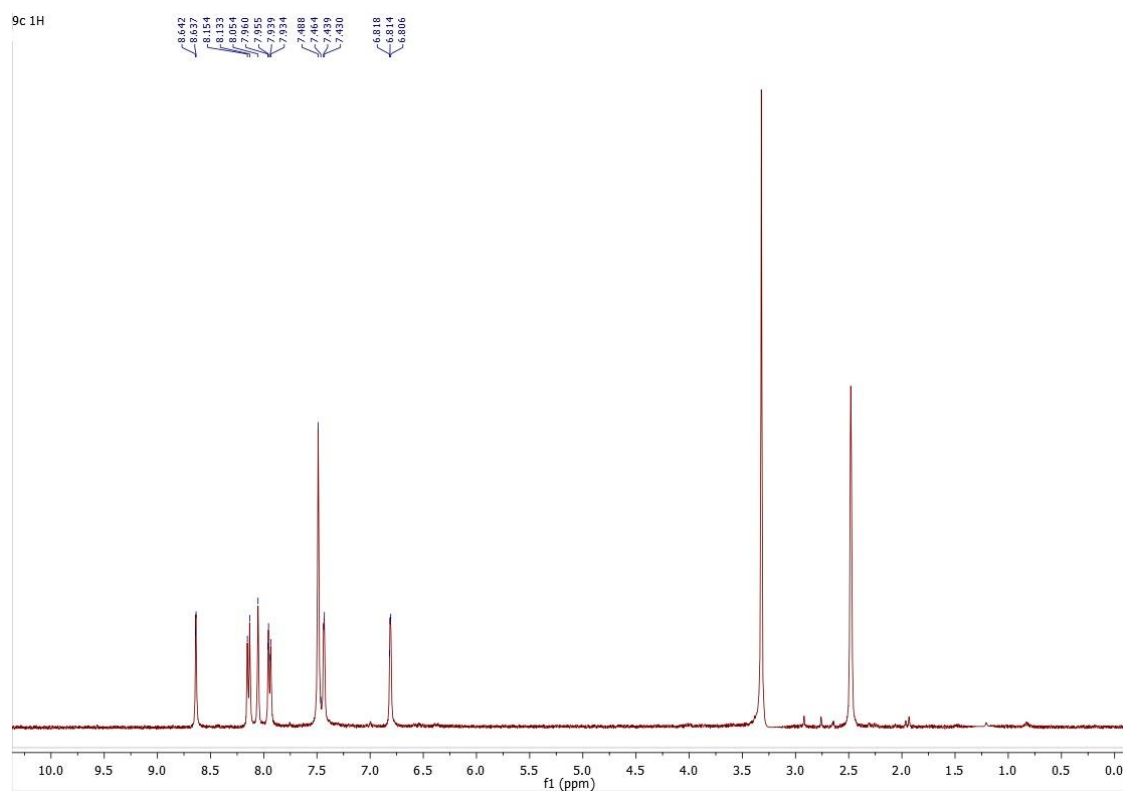

Figure S11.  $^1\text{H}$ -NMR spectrum of compound 9c.

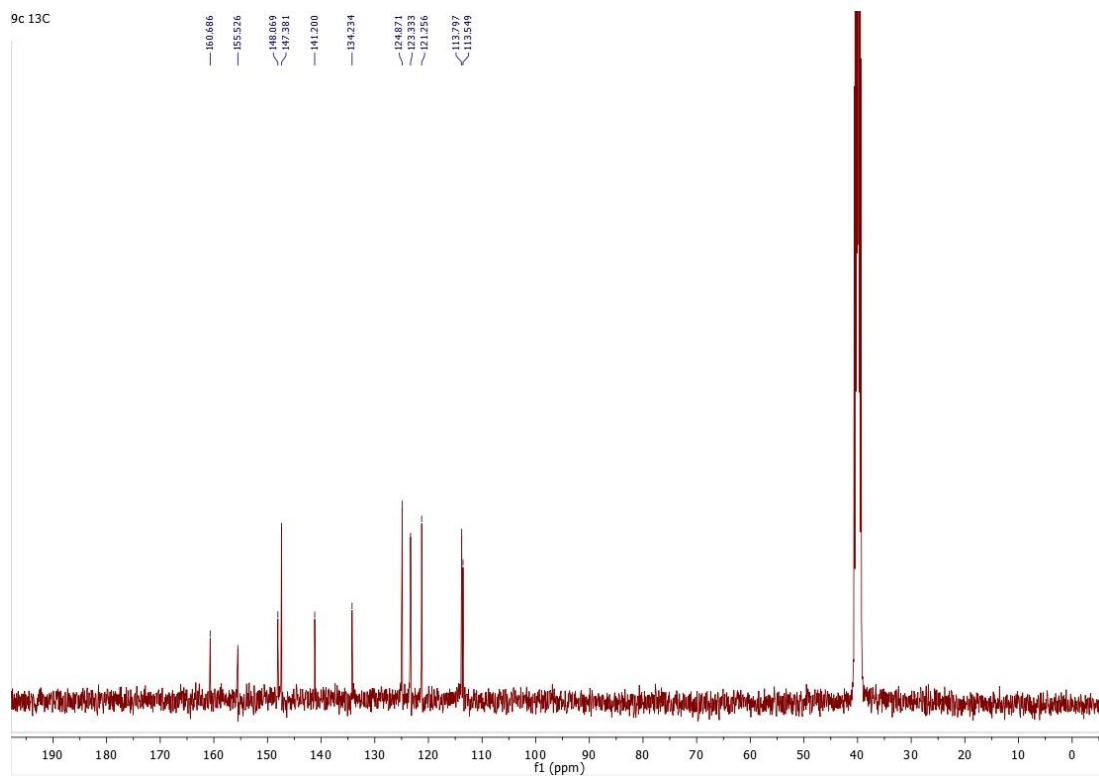

Figure S12.  $^{13}\text{C}$ -NMR spectrum of compound 9c.



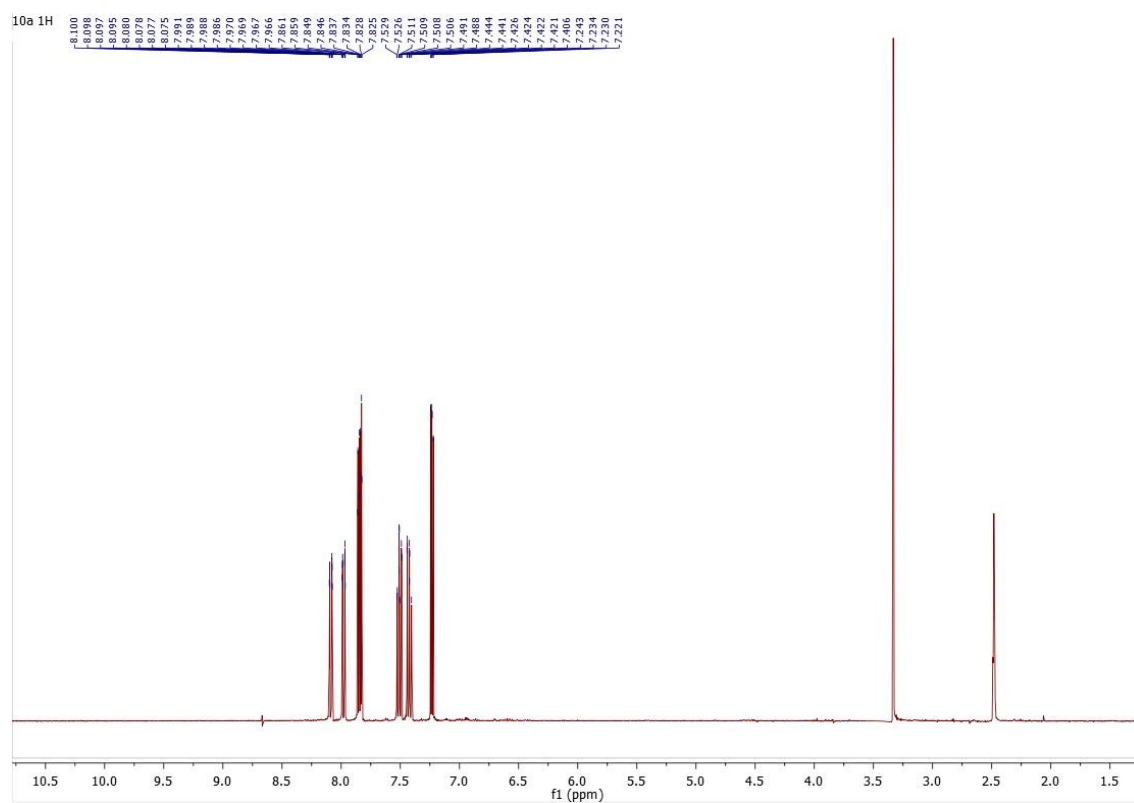

Figure S13.  $^1\text{H}$ -NMR spectrum of compound 10a.

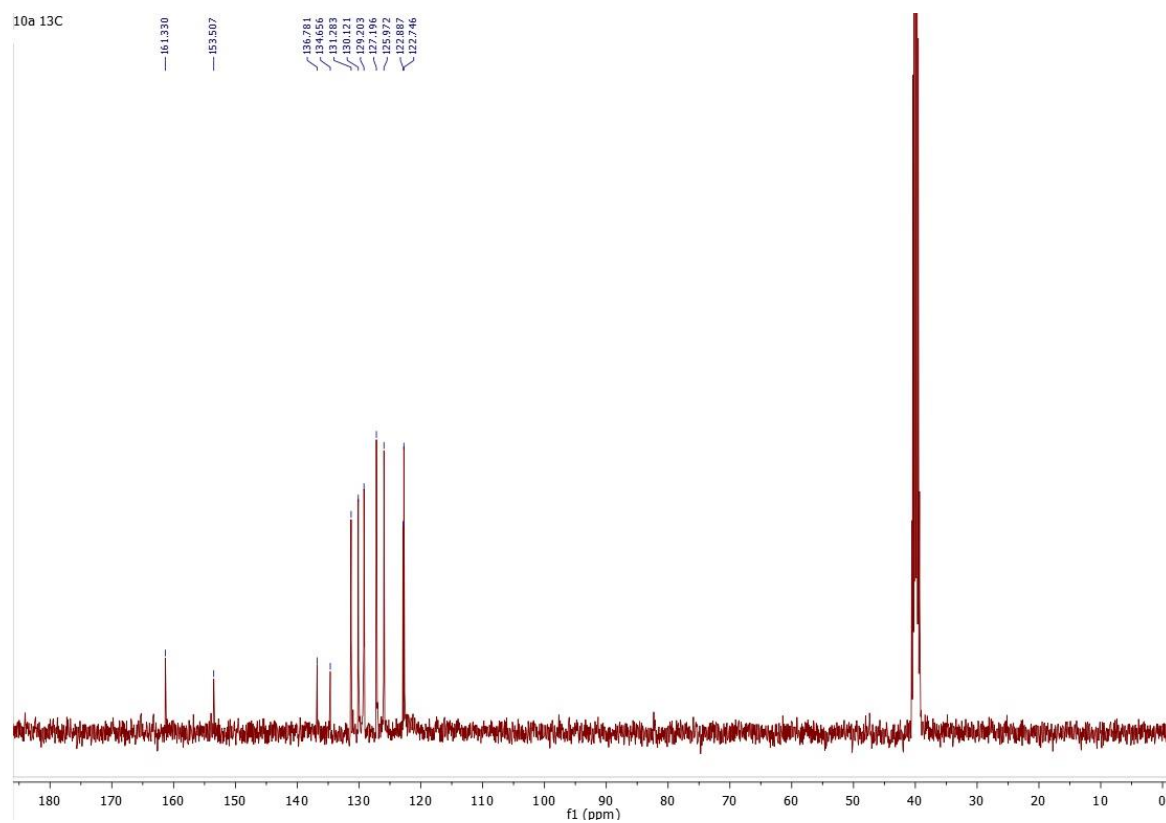

Figure S14.  $^{13}\text{C}$ -NMR spectrum of compound 10a.

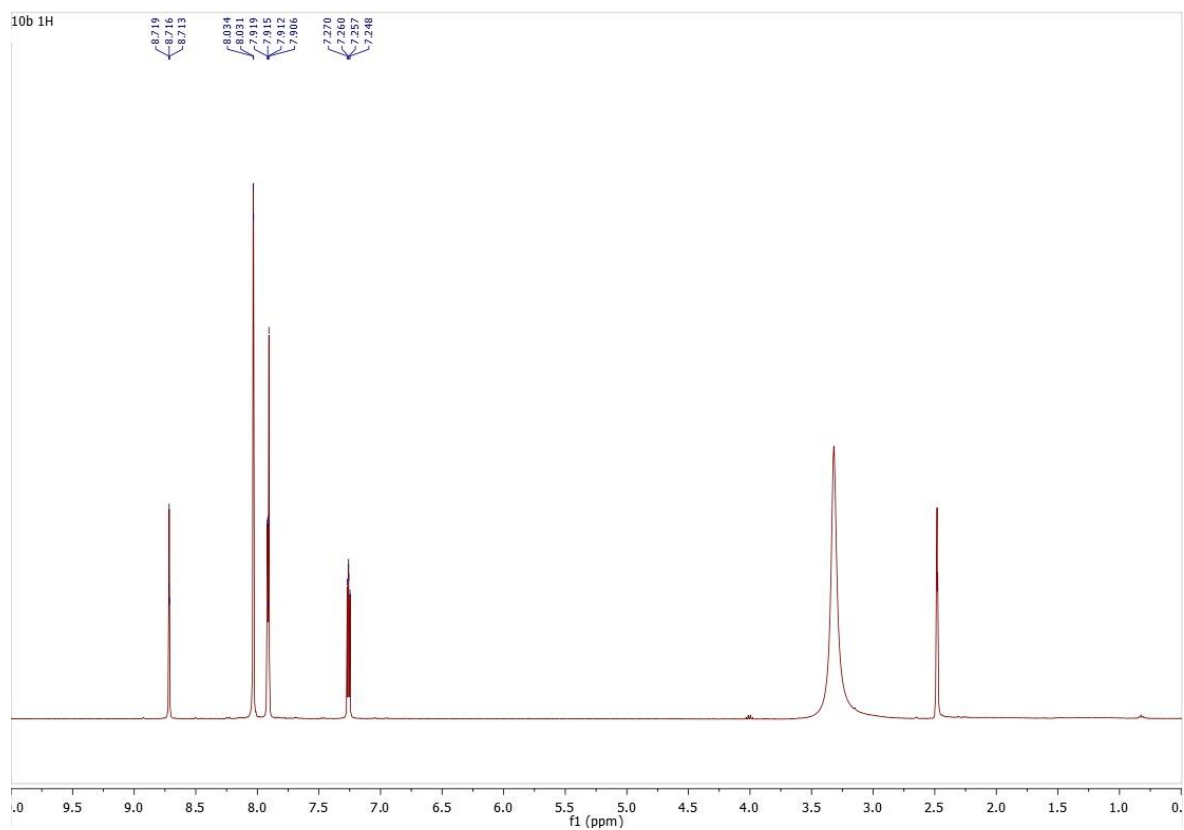

Figure S15.  $^1\text{H}$ -NMR spectrum of compound 10b.

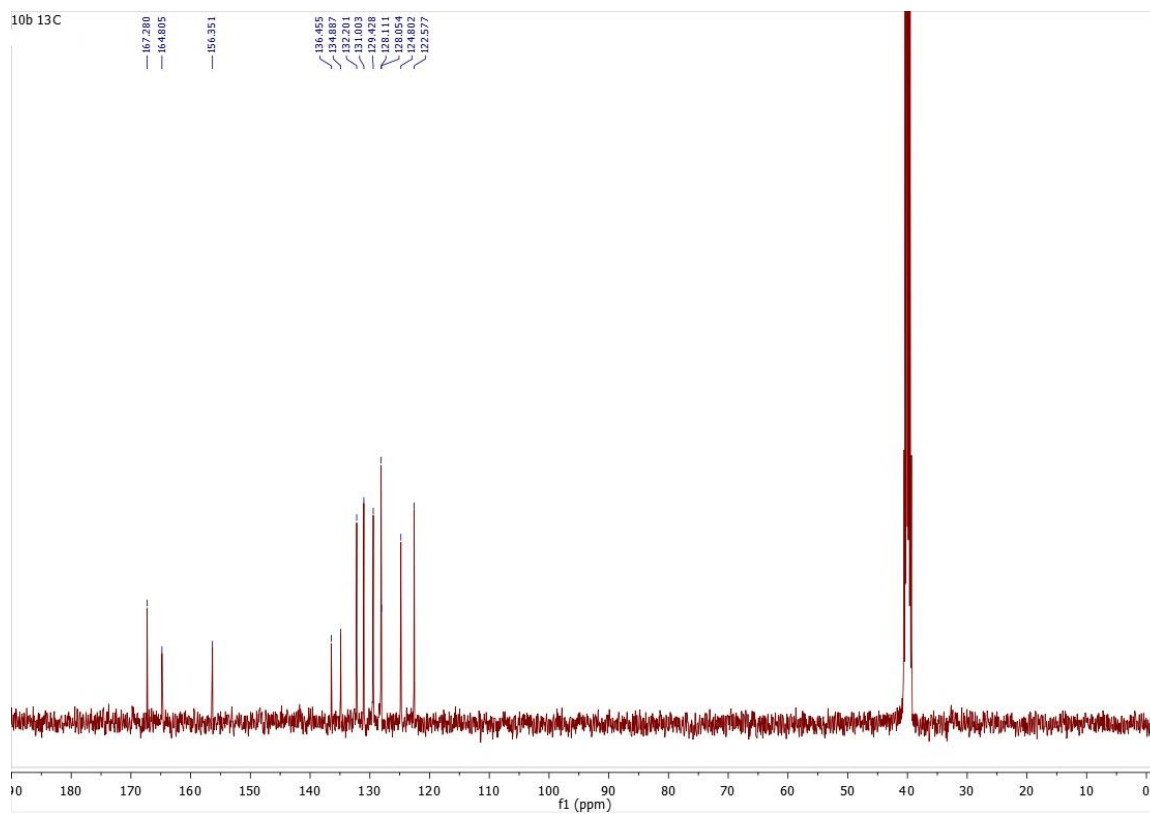

Figure S16.  $^{13}\text{C}$ -NMR spectrum of compound 10b.

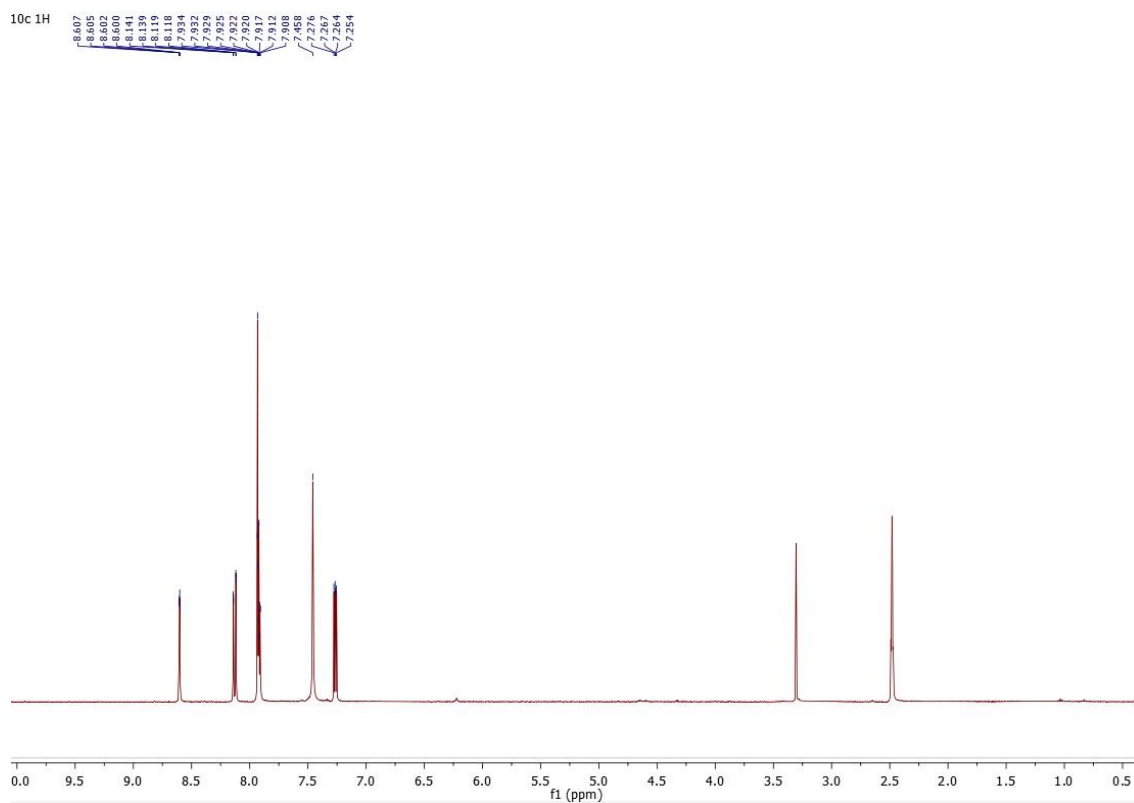

**Figure S17.**  $^1\text{H}$ -NMR spectrum of compound **10c**.

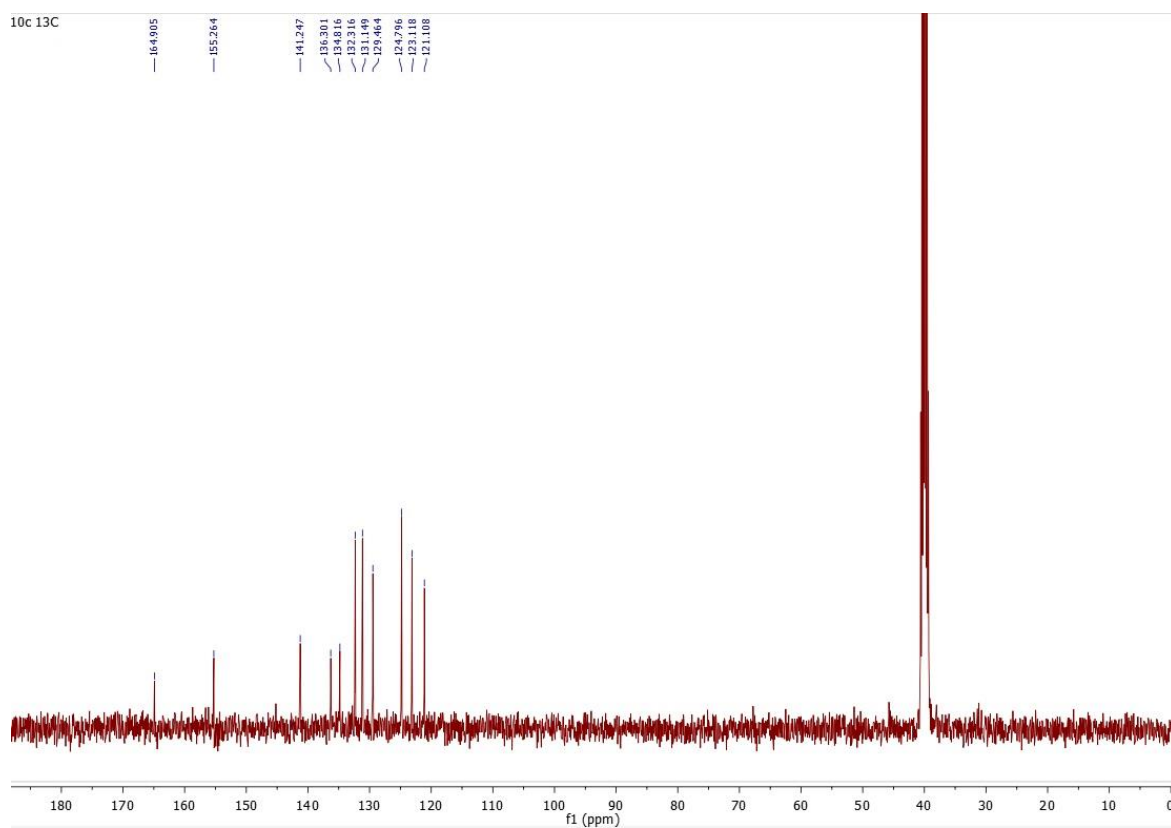

**Figure S18.**  $^{13}\text{C}$ -NMR spectrum of compound **10c**.
